# Supplementary material for: Mimicking of Phase I Metabolism Reactions of Molindone by HLM and Photocatalytic Methods with the Use of UHPLC-MS/MS
Source: MDPI journal article supplement (doi:10.3390/molecules25061367), 2020-03-17
Supplement: s1 [file s1]

## **Supplementary material**

### **Photocatalysis as a new approach to profiling, synthesis and isolation of drugs metabolites: an example of molindone**

Maciej Gawlik<sup>1</sup>, Vladimir Savic<sup>2</sup>, Milos Jovanovic<sup>2</sup>, Robert Skibiński<sup>1\*</sup>

<sup>1</sup>Department of Medicinal Chemistry, Faculty of Pharmacy, Medical University of Lublin, Jaczewskiego 4, 20-090 Lublin, Poland

<sup>2</sup>Department of Organic Chemistry, Faculty of Pharmacy, University of Belgrade, Vojvode Stepe 450, Belgrade, Serbia

\* Corresponding author. Tel.: +48 81 4487390; fax: +48 81 4487380.

E-mail address: robert.skibinski@umlub.pl

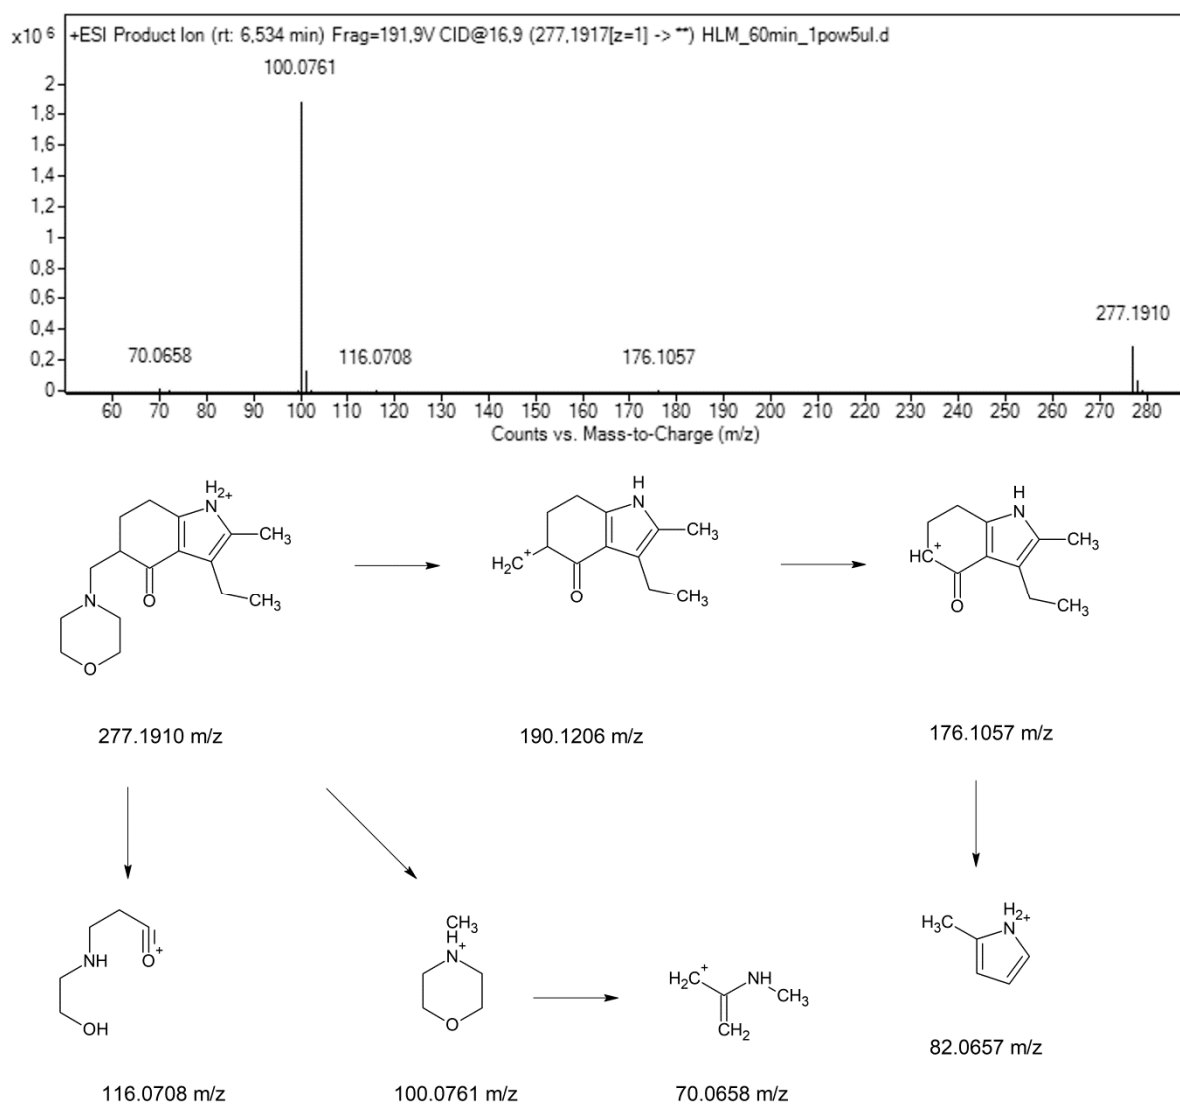

Fig. S1. MS/MS spectrum and fragmentation pathway of molindone

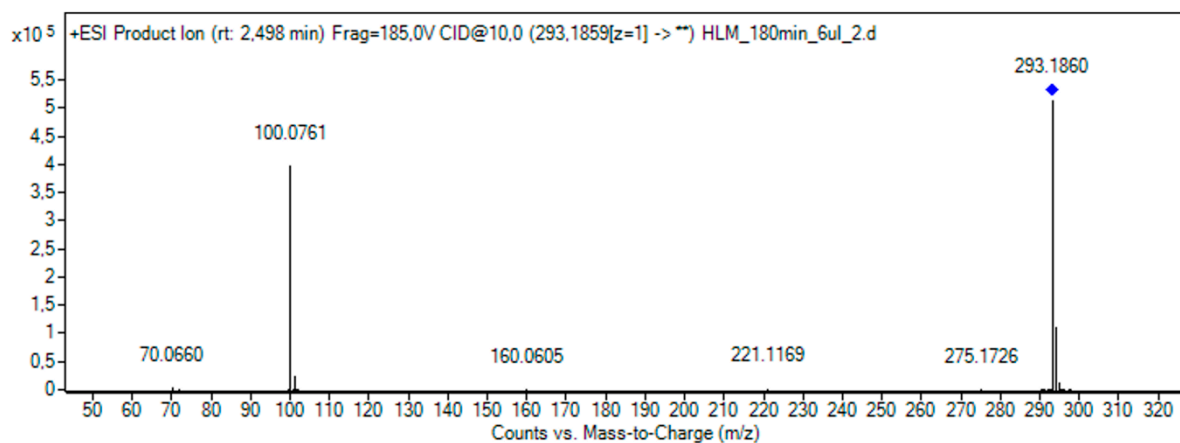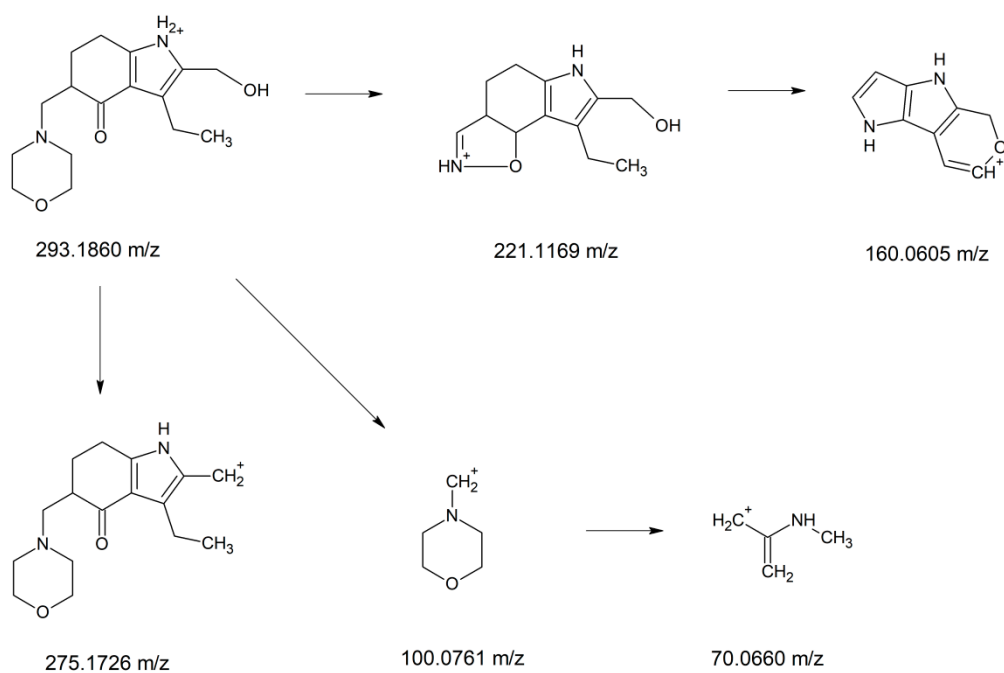

Fig. S2. MS/MS spectrum and fragmentation pathway of M1

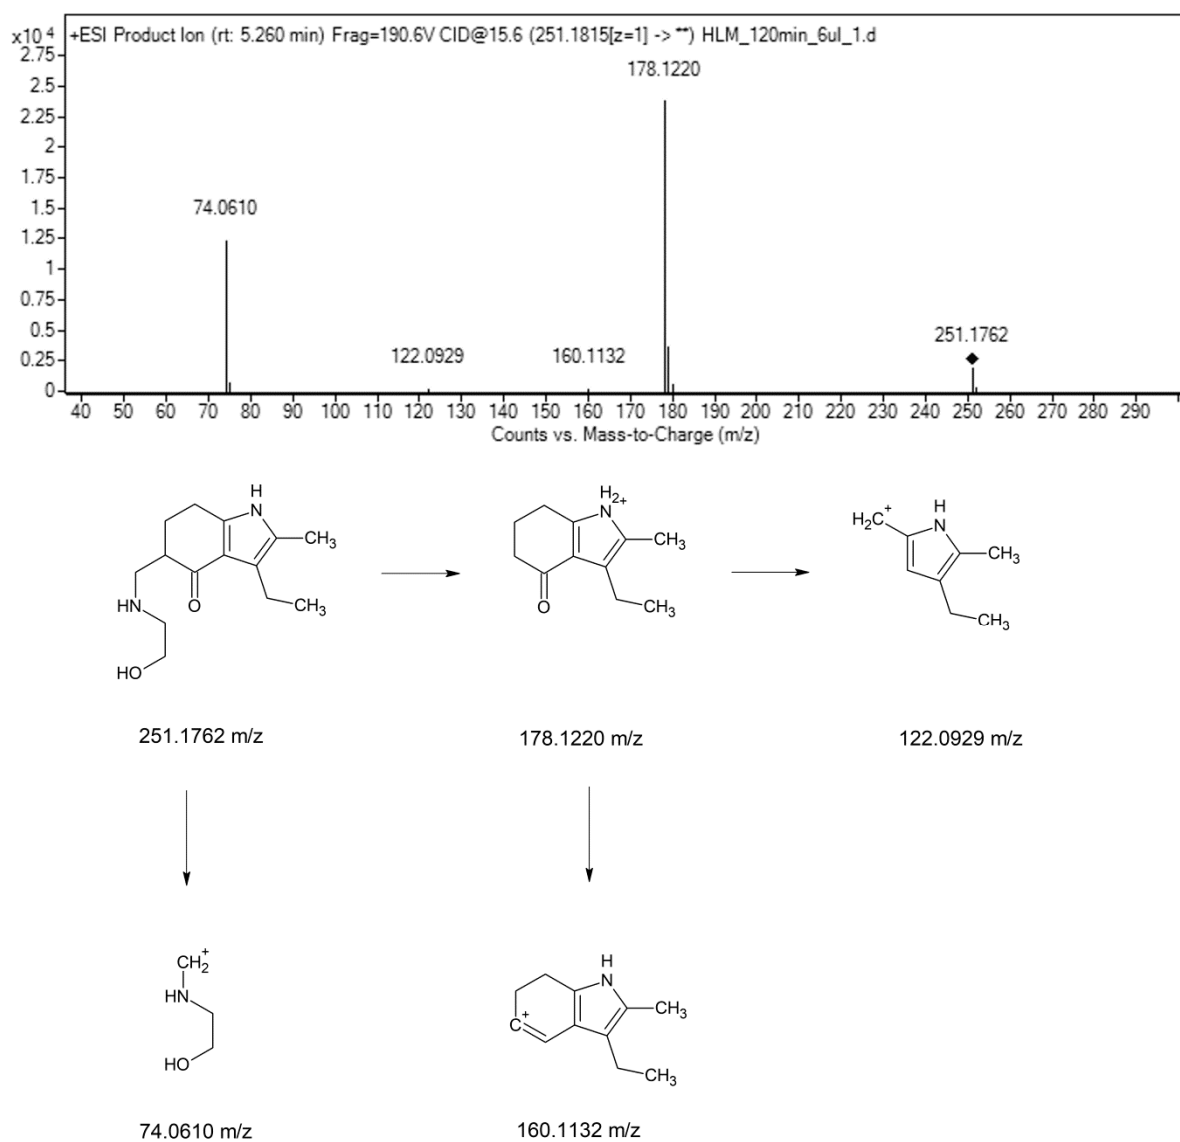

Fig. S3. MS/MS spectrum and fragmentation pathway of M2

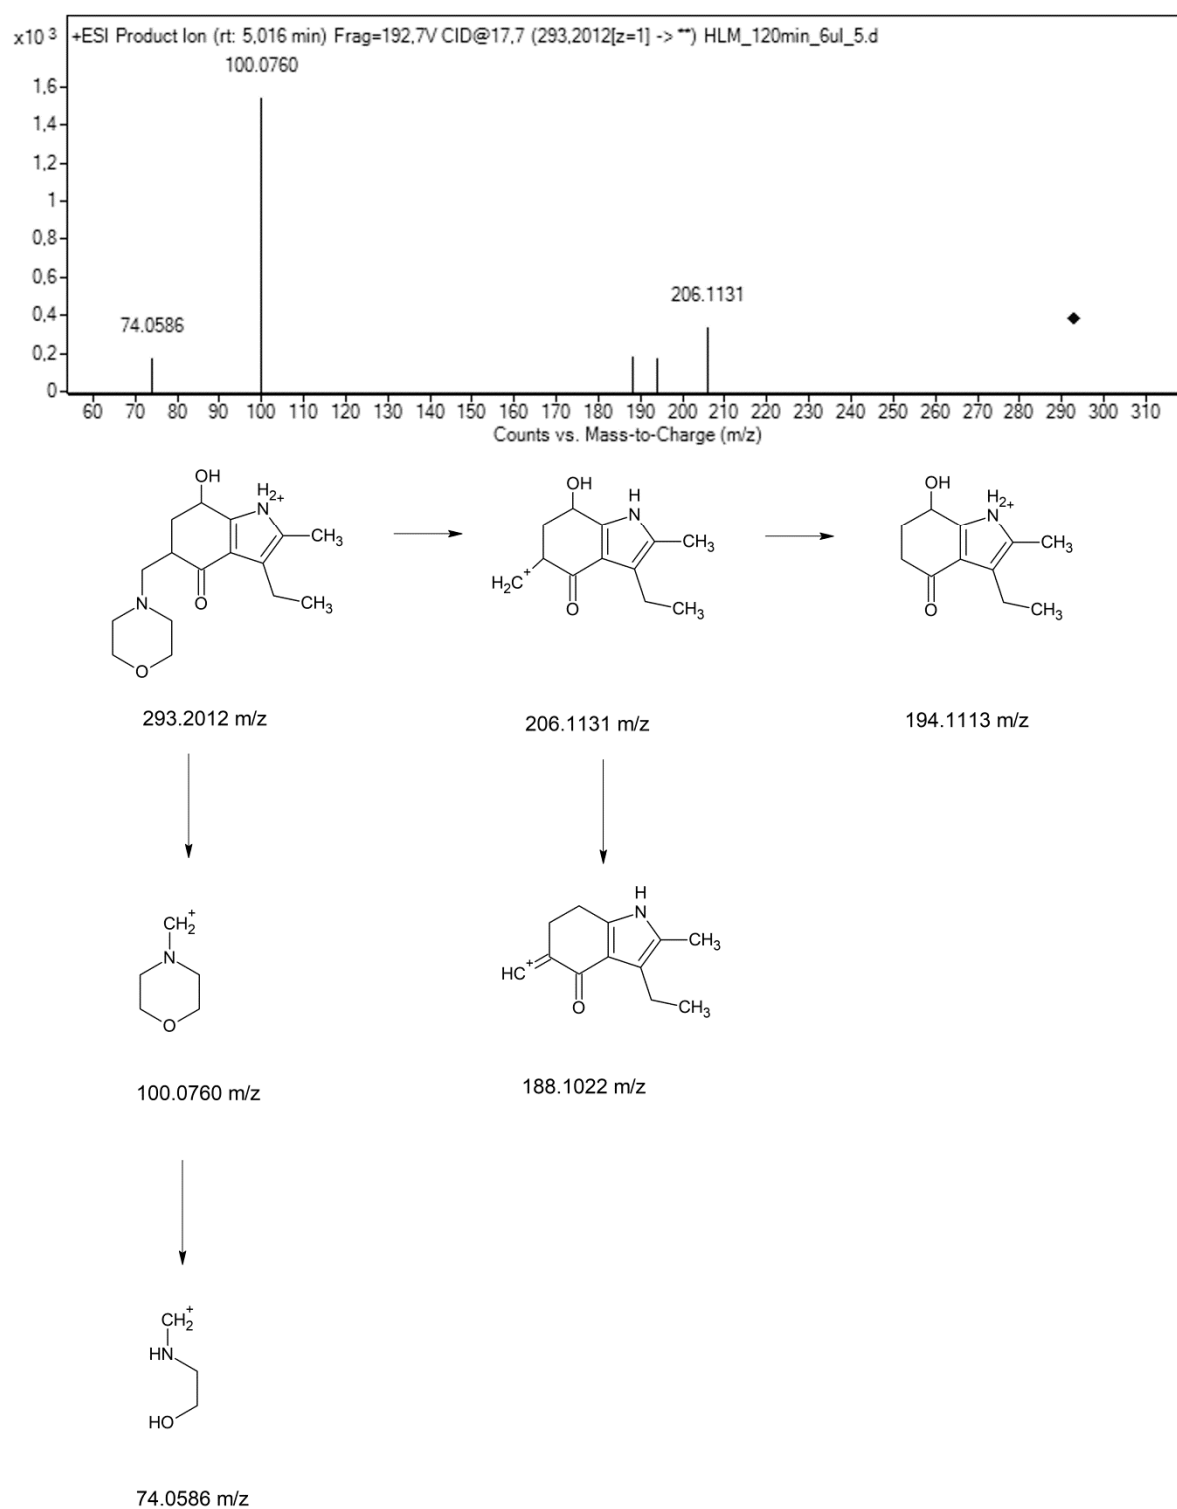

Fig. S4. MS/MS spectrum and fragmentation pathway of M3

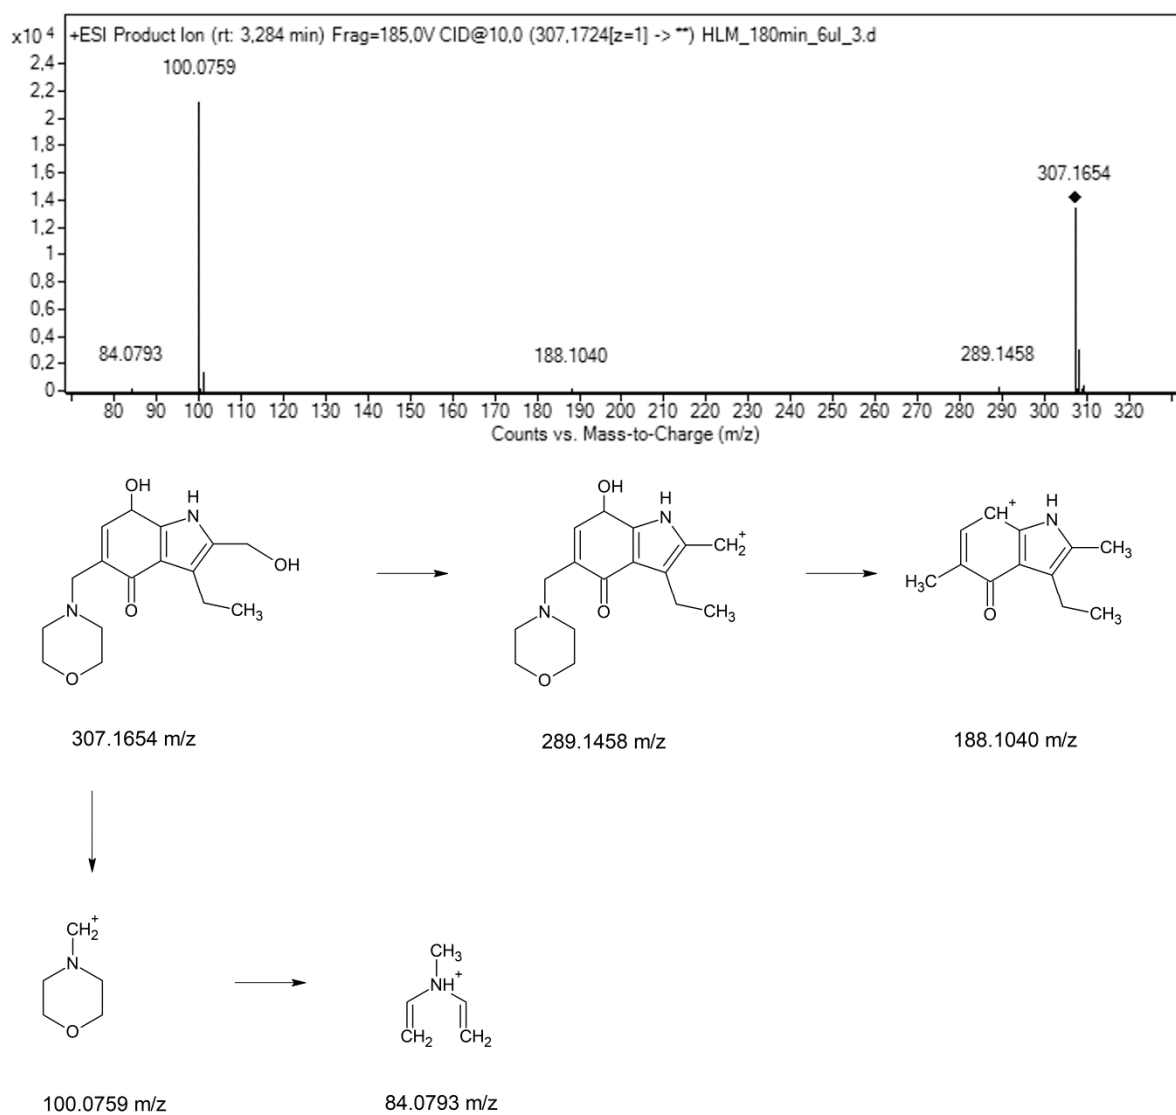

Fig. S5. MS/MS spectrum and fragmentation pathway of M4

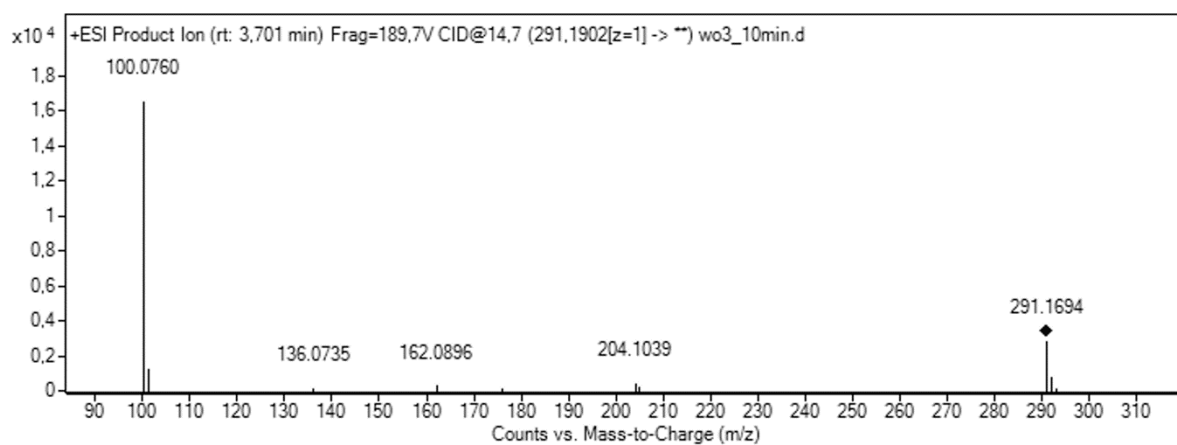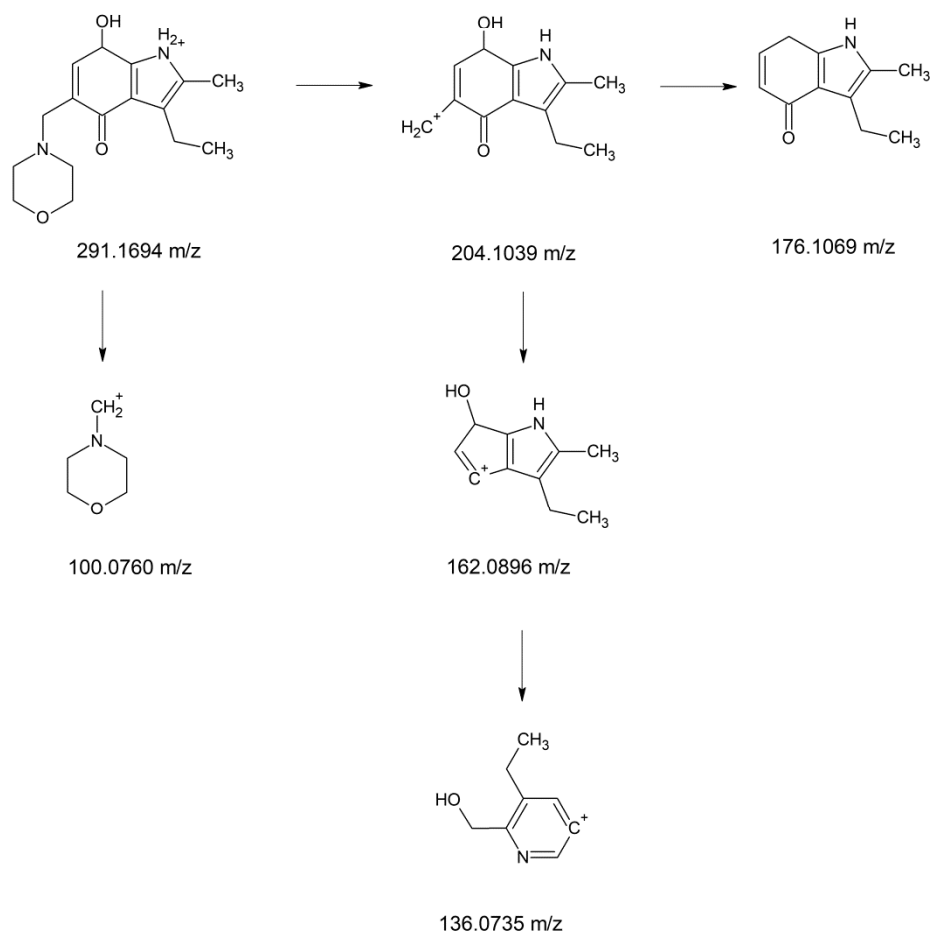

Fig. S6. MS/MS spectrum and fragmentation pathway of M5

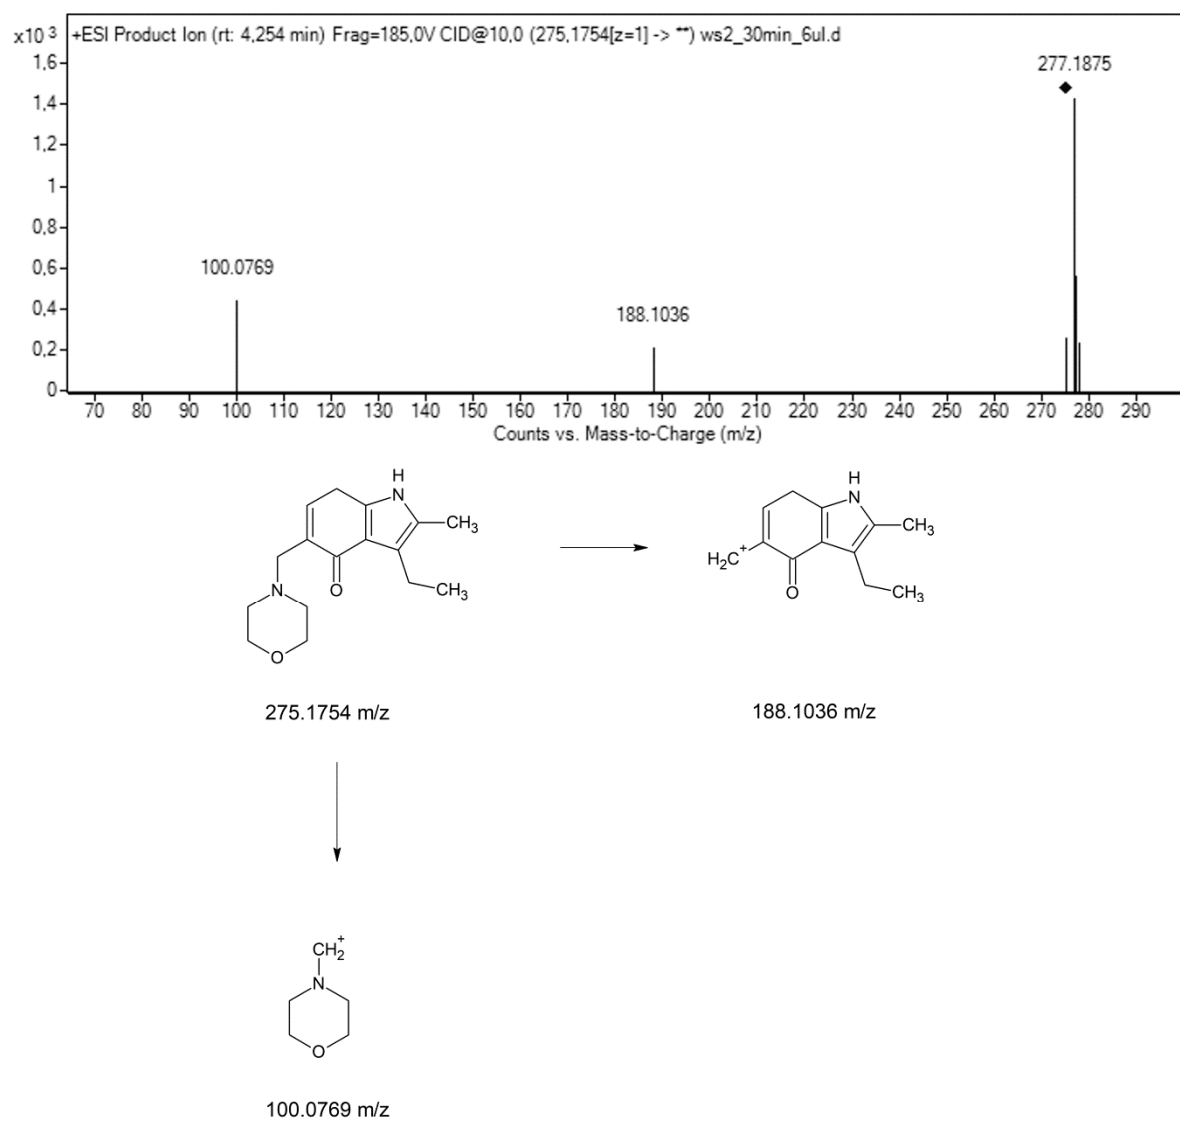

Fig. S7. MS/MS spectrum and fragmentation pathway of M6
